1 **Evaluating Tumor Evolution via Genomic Profiling of Individual**  
2 **Tumor Spheroids in a Malignant Ascites from a Patient with**  
3 **Ovarian Cancer Using a Laser-aided Cell Isolation Technique**

4  
5 Sungsik Kim<sup>1,4,11</sup>, Soochi Kim<sup>3,5,11</sup>, Jinhyun Kim<sup>1</sup>, Boyun Kim<sup>6</sup>, Se Ik Kim<sup>7</sup>, Min A Kim<sup>8</sup>,  
6 Sunghoon Kwon<sup>1-3,\*</sup>, and Yong Sang Song<sup>3,5,7,9,10\*</sup>

7  
8 <sup>1</sup> Department of Electrical and Computer Engineering, Seoul National University, Seoul  
9 08826,  
10 Republic of Korea

11 <sup>2</sup> Institutes of Entrepreneurial BioConvergence, Seoul National University, Seoul 08826,  
12 Republic of Korea

13 <sup>3</sup> Seoul National University Hospital Biomedical Research Institute, Seoul National  
14 University Hospital, Seoul 03080, Republic of Korea

15 <sup>4</sup> Interdisciplinary Program for Bioengineering, Seoul National University, Seoul 08826,  
16 Republic of Korea

17 <sup>5</sup> Cancer Research Institute, Seoul National University College of Medicine, Seoul 03080,  
18 Republic of Korea

19 <sup>6</sup> Department of Anesthesiology, McGovern Medical School, The University of Texas Health  
20 Science Center at Houston, Houston, TX, USA

21 <sup>7</sup> Department of Obstetrics and Gynecology, Seoul National University College of Medicine,

22 Seoul 03080, Republic of Korea

23 <sup>8</sup> Department of Pathology, Seoul National University College of Medicine, Seoul 03080,  
24 Republic of Korea

25 <sup>9</sup> Interdisciplinary Program in Cancer Biology, Seoul National University College of  
26 Medicine, Seoul 03080, Republic of Korea

27 <sup>10</sup> Biomodulation Department of Agricultural Biotechnology, Seoul National University,  
28 Seoul 03080, Republic of Korea

29 <sup>11</sup> These authors contributed equally to this work

30 \* These authors jointly supervised this work. Correspondence should be addressed to SH.K.  
31 (skwon@snu.ac.kr) or Y.S.S (yssong@snu.ac.kr)

32

33

34

35

36

37

38

39

40

41

42

43

44

45

## 46 **Abstract**

### 47 ***Background***

48 Epithelial ovarian cancer (EOC) is a silent but mostly lethal gynecologic malignancy. Most  
49 patients present with malignant ascites and peritoneal seeding at diagnosis. In the present  
50 study, we used a laser-aided isolation technique to investigate the clonal relationship between  
51 the primary tumor and tumor spheroids found in the malignant ascites of an EOC patient.  
52 Somatic alteration profiles of ovarian cancer-related genes were determined for eight spatially  
53 separated samples from primary ovarian tumor tissues and ten tumor spheroids from the  
54 malignant ascites using next-generation sequencing.

### 55 ***Results***

56 We observed high levels of intra-tumor heterogeneity (ITH) in copy number alterations  
57 (CNAs) and single-nucleotide variants (SNVs) in the primary tumor and the tumor spheroids.  
58 As a result, we discovered that tumor cells in the primary tissues and the ascites were  
59 genetically different lineages. We categorized the CNAs and SNVs into clonal and subclonal  
60 alterations according to their distribution among the samples. Also, we identified focal  
61 amplifications and deletions in the analyzed samples. For SNVs, a total of 171 somatic  
62 mutations were observed, among which 66 were clonal mutations present in both the primary  
63 tumor and the ascites, and 61 and 44 of the SNVs were subclonal mutations present in only  
64 the primary tumor or the ascites, respectively.

### 65 ***Conclusions***

66 Based on the somatic alteration profiles, we constructed phylogenetic trees and inferred the  
67 evolutionary history of tumor cells in the patient. The phylogenetic trees constructed using  
68 the CNAs and SNVs showed that two branches of the tumor cells diverged early from an

69 ancestral tumor clone during an early metastasis step in the peritoneal cavity. Our data  
70 support the monophyletic spread of tumor spheroids in malignant ascites.

71 **Keywords:** Tumor evolution, Intra-tumor heterogeneity, Malignant ascites, Next-generation  
72 sequencing, Epithelial ovarian cancer, Phylogenetic analysis

73

74

75

76

77

78

79

80

81

82

83

84

85

86

87

88

89

90

91

92

93



94

95

## 96 **Background**

97        Epithelial ovarian cancer (EOC) is a silent but mostly lethal gynecologic malignancy.

98        The most common histological EOC subtype is high-grade serous carcinoma, and the current

99        treatment strategy involves a primary debulking surgery followed by chemotherapy to reduce

100        the tumor burden [1, 2]. Recent advances in genomics have revealed the presence of

101        extensive intra-tumor heterogeneity (ITH) in many cancers, including ovarian cancer [3-5].

102        The presence of extensive clonal diversity increases the capacity of a given tumor to survive

103        upon an expected strike in the microenvironment and thus is thought to be responsible for a

104        reduced response to current chemotherapy and to contribute to chemoresistance development

105        [6-8].

106        Unlike other solid tumors, the primary route of metastasis in EOC patients is the

107        transcoelomic metastasis route, which is a passive process and involves dissemination of

108        tumor cells from the primary tumor tissue into the peritoneal cavity [9]. Thus, early

109        disseminating clones may exist in the malignant ascites tumor microenvironment (TME) and

110        may form an independent subclonal lineage and contribute to ITH. Both protumorigenic and

111        antitumorigenic factors are known to be enriched in the malignant ascites TME [10].

112        However, genetic differences between tumor cells in the primary tissue and tumor cells

113        surviving in the ascites TME are not yet fully understood. Multi-region sequencing of both

114        the primary tumor and associated metastases in ovarian cancer has provided insights into

115        spatial heterogeneity and has shown that metastatic tumors maintain the genetic alterations

116        found in the primary tumor and arise with little accumulation of genetic alterations [5].

117        However, the extent of the genetic heterogeneity within and between the primary tumor and

118        tumor cells found in ascites remains underestimated.

119 Here, to uncover the genetic heterogeneity of tumor cells in malignant ascites, we  
120 introduced a genetic profiling method for individual tumor spheroids which are the common  
121 form of tumor cells floating in malignant ascites [11]. Inspired by single-cell analysis, we  
122 hypothesized that genetic profiling of individual tumor spheroids might uncover the  
123 heterogeneity within and between the primary tumor and tumor cells in ascites. We isolated  
124 individual tumor spheroids through a laser-aided isolation technique. Then, we performed  
125 low-depth whole-genome sequencing (WGS) and high-depth whole-exome sequencing (WES)  
126 for ten tumor spheroids and eight primary tumor samples from a high-grade serous (HGS)  
127 EOC patient. We explored somatic copy number alterations (CNAs) and single-nucleotide  
128 variants (SNVs) to determine the tumor evolution and ITH between the primary tissues and  
129 the tumor spheroids from the malignant ascites. This study reports the feasibility of analyzing  
130 tumor cells in malignant ascites to detect early disseminating EOC clones.

131

## 132 **Results**

### 133 **Preparation and isolation of single tumor spheroids from the ascites of an ovarian** 134 **cancer patient**

135 A malignant ascites was collected during a primary debulking surgery. The tumor  
136 spheroids in the malignant ascites were purified, fixed and prepared on a discharging layer-  
137 coated glass slide (Fig. 1A). Single tumor spheroids on the slide were isolated by an infrared  
138 (IR) laser pulse as described in our previous publication [12]. Briefly, the discharging layer  
139 consisted of indium tin oxide (ITO), which vaporizes when irradiated by an IR laser pulse.  
140 The ITO vaporization generates pressure, by which cells in the irradiated area are discharged  
141 from the slide. From the prepared sample on the slide, we isolated ten individual tumor  
142 spheroids, which were tens of micrometers in diameter and contained hundreds of cells (Fig.  
143 1B, C). Isolating and capturing each tumor spheroid took less than 1 second on average,

144 which means this technique is feasible for analyzing a large number of samples and could be  
145 implemented in a routine procedure. The isolated single tumor spheroids were collected in  
146 PCR tubes for further reactions.

147

#### 148 **Whole-genome amplification of the isolated individual tumor spheroids**

149 The isolated single tumor spheroids were lysed by proteinase K. Then, the samples  
150 underwent multiple displacement amplification (MDA, Fig. 2A). The amplification was  
151 monitored via real-time PCR. The results showed that all the isolated samples yielded  
152 successful amplification (10/10). Additionally, comparing the amplification plots between the  
153 tumor spheroids and controls showed that there was no or a negligible amount of carry-over  
154 contamination (Fig. 2B). Every reaction yielded over 2  $\mu$ g of amplified DNA, which was  
155 enough to conduct WGS and WES.

156 Next, we calculated and plotted the distributions of the normalized read depth (Fig.  
157 2C) and variant allele frequency (VAF, Fig. 2D) based on the sequencing data to evaluate the  
158 amplification uniformity of the MDA reaction. In the Fig. 2C and 2D, the distributions of the  
159 MDA products from single cells were used for comparison. Normalized read depth indicates  
160 the uniformity of the number of sequencing reads throughout the whole-genome. The DNA  
161 from bulk tumor samples showed normal-like distributions with small variance, but whole-  
162 genome amplified DNA from single cells presented a skewed distribution because of non-  
163 uniform amplification. In contrast, the distributions of the tumor spheroids were similar to the  
164 distributions of the tumor bulk samples, rather than the whole-genome amplified products  
165 from the single cells. This result suggests that the effect of non-uniform amplification during  
166 MDA was minimized because hundreds of cells were included in the individual tumor  
167 spheroids. Similarly, the VAF distributions of the tumor spheroids were similar to those of the  
168 bulk tumor samples but not to the distributions of the single cells. This result supports the

169 presumption that the MDA products of the tumor spheroids present a balanced allele  
170 amplification without losing one of the two alleles.

171

## 172 **Low-depth WGS reveals the somatic CNAs and genetic subclones**

173 First, we assessed the somatic CNAs of the primary ovarian cancer tissues and the  
174 tumor spheroids from the ascites (Additional file 1: Table S1). We carried out low-depth  
175 WGS using the Illumina platform to produce  $8.53 \pm 0.879 (\times 10^6)$  sequenced reads for each  
176 sample. As a result, we generated CNA profiles based on which we performed a hierarchical  
177 clustering analysis (Fig. 3A). The clustering yielded three distinct genetic subgroups. The  
178 primary ovarian cancer tissues (RO 1-7 and LO, named “Primary clone” and colored red)  
179 were clustered together. In contrast, the tumor spheroids from the ascites were divided into  
180 two clusters, one of which showed a primary-like CNA profile (AC 1-3 and 7-8, named  
181 “Ascites clone 1” and colored yellow), but the other presented a normal-like profile (AC 4-6  
182 and 9-10, named “Ascites clone 2”, colored green).

183 Interestingly, the CNA profiles showed that deletion of FAT1 and amplification of  
184 MYC, PARP10, and CYC1 were shared by most of the samples (Fig. 3B). These genes are  
185 reported to be recurrently deleted (FAT1) or amplified (MYC, PARP10, and CYC1) in pan-  
186 cancer data [13]. These facts suggest that the shared CNAs might be the driving alterations at  
187 the first stage of cancer initiation. However, the primary clone had exclusive focal  
188 amplifications of KDM5A and NOTCH3 (Fig. 3B), which are known as recurrently amplified  
189 genes in ovarian cancer [13, 14]. These focal amplifications of KDM5A and NOTCH3 might  
190 allow the primary clone to overwhelm the other subclones and finally dominate the left and  
191 right ovaries. However, we did not find a critical focal amplification or a deep deletion  
192 exclusive to Ascites clone 1. This implied that other types of alterations might drive Ascites  
193 clone 1 to survive or propagate in the peritoneal fluid.

194

## 195 **WES reveals somatic SNVs and genetic subclones**

196 To identify the somatic SNVs, the samples underwent WES. For each sample, the  
197 sequencing run generated  $134 \pm 21.4$  depth of data, covering the whole exome of the human  
198 genome. As a result, 171 somatic SNVs were identified by variant calling from all the  
199 samples (Additional file 2: Table S2). The results shown in Fig. 4A and 4B revealed that 38.6%  
200 of the SNVs were common to the primary tumor and tumor spheroids from the ascites, and  
201 35.7% of the SNVs exclusively belonged to primary-only and 25.7% to ascites-only  
202 mutations. The exclusive mutations in the Ascites clone suggest that this clone evolved by  
203 accumulating mutations independent from the Primary clone. Interestingly, the Ascites clone  
204 had a nonsynonymous mutation in the KRAS gene at 12p12.1. A single nucleotide  
205 substitution (C>T) results in an activating KRAS mutation that is a well-known oncogenic  
206 mutation associated with the anchorage-independent growth of tumor cells through the  
207 acquisition of anoikis resistance in various malignancies [15, 16]. Therefore, the mutation in  
208 KRAS in the Ascites clone might provide an additional fitness gain for anchorage-  
209 independent survival in the ascites TME. However, both the Primary and Ascites clones  
210 shared somatic SNVs in TP53 and ARID1A, which are well-known driver mutations in  
211 ovarian cancer [17, 18]. At the initial stage of tumorigenesis, these mutated genes might be  
212 tumor-initiating SNVs in conjunction with the CNAs of FAT1, MYC, PARP10, and CYC1.  
213 In addition to these somatic variants, the patient had germline variants in BRCA1  
214 (NM\_007294.3:c.1511dupG) and TP53 (NM\_001126118:c.C98G), which are well-known  
215 susceptibility genes of ovarian cancer and are likely to predispose individuals to ovarian  
216 cancer and promote carcinogenesis (Additional file 3: Table S3) [19,20].

217

## 218 **Cellular composition of the tumor spheroids**

219           Regarding the CNAs, Ascites clone 2 had no alteration except for amplification of the  
220 8q24 region. Concerning the SNVs, Ascites clone 2 had fewer mutations than the other  
221 clusters. Based on these facts, we examined the possibility that normal cells exist in a tumor  
222 spheroid. We assumed that the VAF distribution of Ascites clones 1 and 2 would be similar if  
223 the two subclones had a similar proportion of normal cells. However, the VAF of Ascites  
224 clone 2 would be low if a single tumor spheroid from the clone included a high proportion of  
225 normal cells. We tested this idea by plotting the VAF distribution of each sample (Fig. 5). The  
226 results showed that most of the VAF distributions from the Primary clone and Ascites clone 1  
227 were located at a higher range than those from Ascites clone 2. Therefore, we concluded that  
228 the small number of CNAs and SNVs in Ascites clone 2 was not due to their true  
229 characteristics but because the proportion of tumor cells in the tumor spheroid was small.  
230 Consequently, we excluded Ascites clone 2 from the following phylogenetic analysis.

231           In addition to the presence of normal cells in the samples, we examined the possibility  
232 of the presence of heterogeneous tumor cells in the samples. By comparing the allele  
233 frequency distributions of the common and primary-only mutations for each sample, we  
234 found that the allele frequencies of the common mutations were higher than those of the  
235 primary-only mutations for the primary tissues (7 of 8 samples,  $p < 0.01$ ). This result implies  
236 that each of the primary tissues (except RO3) had two or more subclones sharing common  
237 mutations but not subclonal mutations. In contrast, the allele frequencies of the common  
238 mutations were similar to those of the ascites-only mutations for the tumor spheroids (8 of 10  
239 samples). This result can be interpreted to indicate that, compared with the primary tissue  
240 samples, each tumor spheroid was comprised of genetically homogeneous tumor cells.

241

242   **Constructing phylogenetic trees based on the somatic CNAs and SNVs**

243           The phylogenetic trees were constructed from the CNA and SNV data. We achieved a  
244 CNA-based phylogeny analysis by identifying the common chromosomal breakpoints,  
245 calculating a trinary event matrix, and constructing a maximum parsimony tree [28]. The  
246 phylogenetic tree showed that an ancestral cancer clone accumulated CNAs and divided into  
247 two clones, which gained additional exclusive CNAs (Fig. 6A). Notably, these two genetic  
248 clones were composed of tumor spheroids from ascites and tumor tissues. Potentially,  
249 physically separated and biologically distinct TMEs might drive cancer cells into different  
250 alteration statuses.

251           Maximum parsimony tree generation using the CNA data has a couple of limitations.  
252 First, this approach needs to set thresholds to define the amplified, neutral, and deleted status.  
253 The resultant tree is significantly affected by thresholds, and there is no golden rule to set the  
254 thresholds. Second, the proportion of normal cells in a sample has a substantial impact on a  
255 tree because the CNA status might be incorrectly assigned according to the normal cell  
256 portion. For example, the VAFs of RO6 (Fig. 5) show that the sample had a large number of  
257 normal cells. In this case, the copy number value of RO6 was close to the normal value (Fig.  
258 3A), although the overall pattern was not similar to that of the normal sample. Thus, the  
259 thresholding led RO6 to be the same as the normal sample. For this reason, we excluded RO6  
260 when constructing the maximum parsimony tree based on the CNA data.

261           Next, we constructed a phylogenetic tree from the SNV data. This approach does not  
262 use manual thresholding, and a phylogenetic tree is less affected by a normal cell portion.  
263 Therefore, we expected that, compared with the CNA-based approach, this approach would  
264 provide a more accurate result. The results showed that the cancer cells accumulated  
265 mutations as a single clone and divided into two independent clones (Fig. 6B). Moreover,  
266 with the full advantage of the SNV information, the phylogenetic tree presented the  
267 sequential creation of RO3, LO, and the rest of the Primary clones. Overall, the phylogenetic

268 tree based on the SNV data rather than the CNA data presented a more stable and biologically  
269 explainable result.

270

271 **Inferring the evolutionary trajectory of the primary ovarian cancer and the single**  
272 **tumor spheroids in the ascites**

273 This patient harbored a bilateral ovarian tumor at the time of the primary debulking  
274 surgery. It is important to note whether these bilateral tumors arise independently or are the  
275 result of metastasis. The clonal evolution of the tumorigenesis theory provides two  
276 mechanisms of bilateral ovarian tumor development. If bilateral ovarian tumors arise from  
277 independent ancestral clones, they would have distinct genomic profiles without sharing  
278 somatic alterations. In contrast, bilateral tumors would have an identical set of somatic  
279 variants if they resulted from metastasis [21]. The somatic CNAs and SNVs of the left and  
280 right primary ovarian tumor in this study displayed comparable genomic profiles, strongly  
281 indicating a monoclonal origin of the bilateral tumor in this patient. This was further  
282 confirmed by calculating the clonality index (CI) based on previous reports [21, 22] revealing  
283 that the bilateral ovarian tumors were clonally related (CI = 1.0).

284 Finally, the history of the ovarian cancer development and progression was  
285 established based on the genomic profiles to understand the tumor evolution and its direction  
286 in this patient. As noted earlier, ovarian cancer metastasis occurs through a passive process,  
287 which initially involves physical shedding of tumor cells from the primary tumor into the  
288 peritoneal cavity, and the accumulation of ascites facilitates distant seeding of tumor cells  
289 along the peritoneal wall. Given a fixed chance of evolution, two scenarios are possible,  
290 either a monoclonal or polyclonal seeding process. If only certain clones from the primary  
291 tumor are fit to survive in the ascites TME, distinct clones, which may have diverged early,  
292 may be selected and progress over time in the primary and ascites TMEs, showing a tendency



293 toward independent tumor evolution driven by different TMEs. In contrast, if tumor evolution  
294 is entirely driven by clonal dominance and the physical shedding of tumor cells from the  
295 primary tumor occurs by chance, then dominant clones expand in size and others may remain  
296 unchanged or become extinct over time at the primary tumor site. As the tumor grows,  
297 multiple clones may shed from the primary tumor into ascites. The ascites TME then acts as a  
298 reservoir of clonal lineage, and tumor cells in the ascites would represent the entire  
299 mutational landscape of a given tumor. For our case, we observed significant genetic  
300 differences in the CNAs and SNVs among the primary tissue samples and tumor spheroids.  
301 The dominant clones found in the right ovary were absent in the ascites TME, and we found  
302 44 tumor spheroid-specific somatic SNVs (Additional file 2: Table S2). Furthermore, the  
303 comparable allele frequencies between the common mutations and tumor spheroid-specific  
304 mutations suggest that the tumor spheroids in the ascites TME are comprised of genetically  
305 homogeneous tumor cells compared with the primary tissues. Therefore, we conclude that the  
306 tumor spheroids were from a single subclonal lineage, supporting a mono- and early-seeding  
307 origin of the tumor spheroids in this patient. Based on these perspectives, we drew a potential  
308 evolutionary trajectory of the tumor from the patient (Fig. 7A). The tumor was initiated at the  
309 right ovary to generate the ancestral clone. With further accumulation of mutations, the  
310 ancestral clone evolved into two subclones, the first of which was found in the right ovary  
311 and metastasized to the left ovary. The second subclone shed into the ascites TME and  
312 became extinct or dominated by the first subclone in the right ovary (Additional file 4: Table  
313 S4). Eventually, the Ascites subclone moved to the peritoneal cavity. In addition, the  
314 summary of genome-wide somatic CNAs and SNVs indicated that the tumor cells in the  
315 primary tissue and the ascites possessed exclusive alterations as well as common ones (Fig.  
316 7B). This result shows that the tumor cells in the primary tissue and the ascites were two  
317 subclonal lineages, which branched from one ancestral lineage.

318

## 319 **Discussion**

320         In this study, we attempted to determine the presence of genetic heterogeneity within  
321 and between a primary tumor and the associated tumor spheroids in the ascites by performing  
322 multi-region sequencing of the primary tumor and genetic profiling of the individual tumor  
323 spheroids using the laser-aided cell isolation technique. We performed both WGS and WES  
324 of the primary tumor and tumor spheroid samples. First, we discovered high ITH levels in  
325 eight primary tissues and ten tumor spheroids. We also discovered that the CNA profiles in  
326 the primary and associated tumor spheroids were separated into two distinct genetic clusters,  
327 suggesting that the TME may be operative during tumor evolution. Second, we identified  
328 somatic SNVs using WES. We discovered a total of 171 somatic SNVs from all the samples,  
329 and 66 (38.6 %) of these SNVs were ubiquitous mutations that were common to the primary  
330 tumor and tumor spheroids. The rest were either primary-only (61 SNVs, 35.7 %) or ascites-  
331 only (44 SNVs, 25.7 %) mutations, highlighting the notion that the tumor spheroids might  
332 have diverged early and accumulated additional mutations independently from the Primary  
333 clone. Supporting this idea, both phylogenetic analyses, using the CNAs and SNVs, showed  
334 that the tumor spheroids might have diverged early from an ancestral tumor clone, evolved  
335 further with distinctive genomic profiles, and formed an independent subclonal lineage,  
336 thereby contributing to the ITH.

337         We also assessed the normal cell contamination in both the primary tumor and tumor  
338 spheroids using the VAF distribution in each sample. Indeed, both the Primary clone and  
339 Ascites clone 1 showed higher VAF distributions than Ascites clone 2, suggesting that the  
340 normal-like CNA and SNV profiles in Ascites clone 2 were due to a high proportion of  
341 normal cells. These findings are consistent with previous data from ovarian cancer patient-

342 derived tumor spheroids and mouse models that suggested the presence of tumor-associated  
343 macrophages in the center of tumor spheroids [23].

344         Although we only studied a single high-grade EOC patient, our data support previous  
345 studies demonstrating early divergence of the ascites sample from the primary tumor [24].  
346 Further studies are needed to compare similarities and differences between the ascites  
347 spheroids and distant metastasis samples. Our data suggest that the mutation set of ascites  
348 spheroids does not represent the entire mutational landscape of a given EOC patient. This  
349 disagrees with recent findings by Choi et al. [25] showing that ascites tumor cells represent  
350 the entire mutational landscape of a given tumor, and no additional genetic aberrations were  
351 detected. In contrast, our data showed the presence of genetic heterogeneity within and  
352 between the primary tumor and the associated ascites spheroids. Moreover, the primary and  
353 associated ascites spheroids diverged early in tumor development, and not all the Primary  
354 clones disseminated into the ascites TME. However, our study is limited to a single ascites  
355 TME and provided no insight into distant metastatic sites.

356         Additionally, our data demonstrated that, compared with the primary tissue samples,  
357 each tumor spheroid was comprised of genetically homogeneous tumor cells (Fig. 5). This  
358 can be interpreted in two ways. First, the tumor cells in an ascites may have low ITH. In this  
359 case, the spheroids of the tumor cells would be genetically homogeneous. Second, the tumor  
360 cells with a similar genetic profile may form individual tumor spheroids. In this case, the  
361 tumor cells in each tumor spheroid might have the same genetic profile, but two different  
362 tumor spheroids might be genetically different. For this case, isolating and analyzing the  
363 individual tumor spheroids from ascites might be widely utilized to discover the ITH of  
364 ovarian cancer.

365         Our data can partly be explained by the theory of Darwinian selection. For simplicity,  
366 tumor evolution is described as a series of expansions of clones, where each expansion series

367 is driven by additional mutation acquisition, and clone fitness is tested by Darwinian  
368 selection. This selective sweep is context-dependent, and thus, genetic variants that are  
369 beneficial at a certain point may become extinct throughout the period of tumor progression.  
370 As a consequence, these clones may be absent in a fully grown tumor [26]. The selective  
371 pressures are further influenced by the dynamics of the TME, thereby increasing the  
372 complexity of tumor evolution [27]. The presence of extensive ITH in tumor spheroids and  
373 the early divergence of these subclones from the primary tumor suggests that we are currently  
374 underestimating the tumor genomic landscape.

375 In addition to the importance of genetic differences between tumor cells in primary  
376 tissue and those in ascites, knowledge regarding the genetic heterogeneity within the tumor  
377 cells in ascites would be valuable. Although not thoroughly studied, the genetic diversity of  
378 tumor cells in an ascites may have a large impact on tumor relapse and metastasis, given that  
379 transcoelomic spread is the primary route of metastasis in ovarian cancer. However, there has  
380 been no attempt to discover the genetic heterogeneity of individual tumor spheroids. In this  
381 study, we evaluated 10 individual tumor spheroids, five of which contained sufficient tumor  
382 cells for the analysis. Although we observed genetic heterogeneity of the individual ascites  
383 spheroids, a follow-up study should analyze at least a few tens of individual tumor spheroids  
384 per patient to find a clear signature of the genetic heterogeneity in an ascites.

385

## 386 **Conclusion**

387 In this study, we performed genome-wide sequence analysis of the primary tumor  
388 and the associated tumor spheroids in the malignant ascites of an EOC patient. We analyzed  
389 genetic heterogeneity in the primary tumor and tumor spheroids through multi-region  
390 sequencing and the laser-aided cell isolation technique [12]. From the sequencing data, we  
391 discovered clonal or subclonal somatic CNAs and SNVs, based on which we constructed

392 phylogenetic trees and inferred the evolutionary history of tumor cells in the patient. As a  
393 result, we found that the tumor cells in the malignant ascites were an independent lineage  
394 from the primary tumor. The phylogenetic analysis showed that the lineage branched before  
395 the evolution of the cancer cells at the primary tissues, which suggests that analyzing  
396 malignant ascites might be used to detect ovarian cancer or metastasis in the early stage. In  
397 summary, the genetic plasticity and similarity between a primary tumor and associated tumor  
398 spheroids are still not clear, and yet, the nature of the similarity may have profound  
399 implications for both tumor progression and therapeutic outcomes in ovarian cancer.  
400 Therefore, future prospective studies profiling the genomic information of primary ovarian  
401 tumors, distant metastatic tumors, and tumor spheroids to determine the direction of tumor  
402 evolution and metastasis of ovarian cancer are warranted.

403

## 404 **Methods**

### 405 *Patient information and sample preparation*

406 A 42 yr old female patient diagnosed with primary high-grade serous ovarian cancer (Grade 3,  
407 stage IIIC) presented with malignant ascites and peritoneal seeding. Both primary tissues and  
408 malignant ascites were collected during primary debulking surgery. Fresh primary tissues and  
409 tumor cell clusters were mounted onto ITO-coated glass slides. Six samples were taken  
410 randomly from the solid portions of right ovary and only one from left ovary. Blood was  
411 collected to serve as the normal control. Ten tumor cell clusters were collected from the  
412 malignant ascites and fixed in 10% (v/v) formaldehyde. This study was approved by the  
413 Institutional Review Board (IRB) at Seoul National University Hospital (Registration number:  
414 1305-546-487) and performed in compliance with the Helsinki Declaration. We obtained  
415 informed consent from the patient prior to primary debulking surgery to be used in research.

416

417 ***Laser-aided isolation of tumor spheroids and their whole-genome amplification***

418 Previously, we developed and published a laser-aided cell isolation technique [12], and  
419 designed two different pieces of software written in Python scripts and available at Github  
420 (<https://github.com/BiNEL-SNU/PHLI-seq>). Isolation of tumor spheroids was performed as  
421 described in the prior publication. In brief, an infrared laser was applied to the target area,  
422 vaporizing Indium Tin Oxide (ITO) layer and discharging the targeted tumor spheroid on the  
423 region. We used glass slides with a 100-nm-thick ITO layer.

424 The 8-strip PCR tube caps for the retrieval of tumor spheroids were pre-exposed under O<sub>2</sub>  
425 plasma for 2 minutes. The tumor spheroids were lysed using proteinase K (cat no. P4850-  
426 1ML, Sigma Aldrich) according to the manufacturer's directions after the PCR tubes were  
427 centrifuged. For whole-genome amplification, we used GE's Illustra Genomiphi V2 DNA  
428 amplification kit (cat no. 25-6600-30). We added 0.2 µl of SYBR green I (Life Technologies)  
429 into the reaction solution for real-time monitoring of the amplification (Fig. 2B). All  
430 amplified products were purified using Beckman Coulter's Agencourt AMPure XP kit (cat no.  
431 A63880) immediately following the amplification. To prevent carry-over contamination, the  
432 pipette tip, PCR tube, and cap for the reaction were stored in a clean bench equipped with UV  
433 light and treated with O<sub>2</sub> plasma for 2 minutes before use. Additionally, we monitored the  
434 real-time amplification of non-template controls to ensure that no contaminants were  
435 transferred.

436

437 ***Sequencing library preparation, whole-genome, and whole-exome sequencing***

438 The whole-genome amplified products or genomic DNA were fragmented using an EpiSonic

439 Multi-Functional Bioprocessor 1100 (Epigentek) to generate DNA fragments with 250-bp on  
440 average. The fragmented products underwent Illumina library preparation using Celemics  
441 NGS Library Preparation Kit (LI1096, Celemics, Seoul, Korea) for the whole-genome  
442 sequencing library preparation, and SureSelectXT (Agilent, CA, US) for whole-exome  
443 sequencing. DNA purification was performed by TOPQXSEP MagBead (XB6050, Celemics,  
444 Seoul, Korea), and DNA libraries were amplified using the KAPA Library Amplification Kit  
445 (KAPA Biosystems, KK2602). Finally, the products were quantified by TapeStation 2200  
446 (Agilent, CA, US). We used HiSeq 2500 150 PE (Illumina) to generate 1 Gb/sample for  
447 whole-genome sequencing and 5 Gb/sample for whole-exome sequencing, respectively.

448

#### 449 *Detecting copy number alterations*

450 We used low-depth whole-genome sequencing data and the variable-size binning method [29]  
451 to estimate the CNAs of the samples. Briefly, the whole genome was divided into 15,000  
452 variable-sized bins (median genomic length of bin = 184 kbp), in which each bin had an  
453 equal expected number of uniquely mapped reads. Then, each sequence read was assigned to  
454 each bin followed by Lowess GC normalization to obtain the read depth of each bin. The  
455 copy number was estimated by normalizing the read depth of each bin by the median read  
456 depth of the reference DNA.

457

#### 458 *Detecting Single Nucleotide Variants*

459 GATK (v3.5-0) IndelRealigner and BaseRecalibrator were used to locally realign reads  
460 around the Indel and recalibrate the base quality score of BAM files [30]. Then, GATK  
461 UnifiedGenotyper, Varscan, and MuTect were used and combined the results to avoid false-

462 positive variant calls [31]. First, GATK UnifiedGenotyper was used with default parameters  
463 followed by GATK VariantRecalibrator to obtain filtered variants [30]. Data of primary tissue  
464 samples and ascites tumor spheroid samples were processed together to produce a single vcf  
465 file. dbSNP build 137, HapMap 3.3, Omni 2.5, and 1000G phase1 were used as the training  
466 data for variant recalibration. Also, annotation data including QD, MQ, FS,  
467 ReadPosRankSum, and MQRankSum were used for the training. Variants detected in the  
468 paired blood sample of the cancer patient were removed to produce the final list of GATK  
469 called variants. VarScan2 [32] (ver 2.3.7) and Mutect [33] (ver 1.1.4) were used with default  
470 parameters to produce the lists of VarScan and MuTect called variants, respectively. Here,  
471 paired blood read data was also used to remove germline variants.

472 Among the variants from the three callers, variants called by at least two callers were  
473 collected to obtain intra-sample double-called sites. We could reduce false-positive variant  
474 caused by NGS errors by considering only double-called variants for subsequent analysis [31].  
475 Among the intra-sample double called sites, variants found in at least two samples were  
476 collected to remove WGA (whole genome amplification) errors, and the genomic loci with  
477 the resultant variants were considered confident sites. Finally, a variant in the confident sites  
478 was considered to be true if one of the three variant callers detected the variant at the locus  
479 and the allele count of the variant was significantly larger than that of the other non-reference  
480 bases (Fisher's exact test,  $p < 10^{-3}$ ). The overall process is visually described in Additional  
481 file5: Figure S1.

482

483

484

485



486

487

488 **Abbreviations:**

489 EOC: Epithelial ovarian cancer

490 ITH: Intra-tumor heterogeneity

491 CNA: Copy number alteration

492 SNV: Single-nucleotide variant

493 TME: Tumor microenvironment

494 WGS: Whole-Genome Sequencing

495 WES: Whole-exome sequencing

496 HGS: High-grade serous

497 ITO: Indium tin oxide

498 MDA: Multiple displacement amplification

499 VAF: Variant allele frequency

500 CI: Clonality index

501

502 **Declarations**

503 *Ethics approval and consent to participate*

504 This study was approved by the Institutional Review Board (IRB) at Seoul National

505 University Hospital (Registration number: 1305-546-487) and performed in compliance with

506 the Helsinki Declaration. We obtained informed consent from the patient prior to primary

507 debulking surgery to be used in research.

508

509 *Consent for publication*

510 Not applicable

511

512 *Availability of data and materials*

513 The datasets used and/or analyzed during the current study are available from the  
514 corresponding author on reasonable request

515

516 *Competing interests*

517 The authors declare that they have no competing interests

518

519 *Acknowledgements*

520 Not applicable

521

522 **References**

- 523 1. Reid BM, Permuth JB, Sellers TA. Epidemiology of ovarian cancer: a review. *Cancer*  
524 *Biol Med.* 2017;14:9-32.
- 525 2. Jessmon P, Boulanger T, Zhou W, Patwardhan P. Epidemiology and treatment patterns  
526 of epithelial ovarian cancer. *Expert Rev Anticancer Ther.* 2017;17:427-37.
- 527 3. Ding L, Ley TJ, Larson DE, Miller CA, Koboldt DC, Welch JS, et al. Clonal  
528 evolution in relapsed acute myeloid leukaemia revealed by whole-genome sequencing.  
529 *Nature.* 2012;481:506-10.
- 530 4. Gerlinger M, Rowan AJ, Horswell S, Math M, Larkin J, Endesfelder D, et al.  
531 Intratumor heterogeneity and branched evolution revealed by multiregion sequencing.  
532 *N Engl J Med.* 2012;366:883-92.
- 533 5. Lee JY, Yoon JK, Kim B, Kim S, Kim MA, Lim H, et al. Tumor evolution and  
534 intratumor heterogeneity of an epithelial ovarian cancer investigated using next-  
535 generation sequencing. *BMC Cancer.* 2015;15:85.

- 536 6. Swanton C. Intratumor heterogeneity: evolution through space and time. *Cancer Res.*  
537 2012;72:4875-82.
- 538 7. Bilen MA, Hess KR, Campbell MT, Wang J, Broaddus RR, Karam JA, et al.  
539 Intratumoral heterogeneity and chemoresistance in nonseminomatous germ cell tumor  
540 of the testis. *Oncotarget.* 2016;7:86280-9.
- 541 8. Greaves M. Evolutionary determinants of cancer. *Cancer Discov.* 2015;5:806-20.
- 542 9. Tan DS, Agarwal R, Kaye SB. Mechanisms of transcoelomic metastasis in ovarian  
543 cancer. *Lancet Oncol.* 2006;7:925-34.
- 544 10. Kim S, Kim B, Song YS. Ascites modulates cancer cell behavior, contributing to  
545 tumor heterogeneity in ovarian cancer. *Cancer Sci.* 2016;107:1173-8.
- 546 11. Smolle E, Taucher V, Haybaeck J. Malignant ascites in ovarian cancer and the role of  
547 targeted therapeutics. *Anticancer Res.* 2014;34:1553-61.
- 548 12. Kim S, Lee AC, Lee H, Kim J, Jung Y, Ryu HS, et al. Constructing and visualizing  
549 cancer genomic maps in 3D spatial context by Phenotype-based High-throughput  
550 Laser-aided Isolation and Sequencing (PHLI-seq). *bioRxiv* 2018; doi:  
551 10.1101/278010
- 552 13. Zack TI, Schumacher SE, Carter SL, Cherniack AD, Saksena G, Tabak B, et al. Pan-  
553 cancer patterns of somatic copy number alteration. *Nat Genet.* 2013;45:1134-40.
- 554 14. Park JT, Li M, Nakayama K, Mao TL, Davidson B, Zhang Z, et al. Notch3 gene  
555 amplification in ovarian cancer. *Cancer Res.* 2006;66:6312-8.
- 556 15. Derouet M, Wu X, May L, Hoon Yoo B, Sasazuki T, Shirasawa S, et al. Acquisition of  
557 anoikis resistance promotes the emergence of oncogenic K-ras mutations in colorectal  
558 cancer cells and stimulates their tumorigenicity in vivo. *Neoplasia.* 2007;9:536-45.
- 559 16. Rytomaa M, Martins LM, Downward J. Involvement of FADD and caspase-8  
560 signalling in detachment-induced apoptosis. *Curr Biol.* 1999;9:1043-6.

- 561 17. Ahmed AA, Etemadmoghadam D, Temple J, Lynch AG, Riad M, Sharma R, et al.  
562 Driver mutations in TP53 are ubiquitous in high grade serous carcinoma of the ovary.  
563 J Pathol. 2010;221:49-56.
- 564 18. Wiegand KC, Shah SP, Al-Agha OM, Zhao Y, Tse K, Zeng T, et al. ARID1A  
565 mutations in endometriosis-associated ovarian carcinomas. N Engl J Med.  
566 2010;363:1532-43.
- 567 19. Welch PL, King MC. BRCA1 and BRCA2 and the genetics of breast and ovarian  
568 cancer. Hum Mol Genet. 2001;10:705-13.
- 569 20. Xi Y, Liu C, Xin X. Association between a single nucleotide polymorphism in the  
570 TP53 region and risk of ovarian cancer. Cell Biochem Biophys. 2014;70:1907-12.
- 571 21. Yin X, Jing Y, Cai MC, Ma P, Zhang Y, Xu C, et al. Clonality, heterogeneity and  
572 evolution of synchronous bilateral ovarian cancer. Cancer Res. 2017;77:6551-61.
- 573 22. Schultheis AM, Ng CK, De Filippo MR, Piscuoglio S, Macedo GS, Gatus S, et al.  
574 Massively parallel sequencing-based clonality analysis of synchronous  
575 endometrioidendometrial and ovarian carcinomas. J Natl Cancer Inst.  
576 2016;108:djv427.
- 577 23. Yin M, Li X, Tan S, Zhou HJ, Ji W, Bellone S, et al. Tumor-associated macrophages  
578 drive spheroid formation during early transcoelomic metastasis of ovarian cancer. J  
579 Clin Invest. 2016;126:4157-73.
- 580 24. Schwarz RF, Ng CK, Cooke SL, Newman S, Temple J, Piskorz AM, et al. Spatial and  
581 temporal heterogeneity in high-grade serous ovarian cancer: a phylogenetic analysis.  
582 PLoS Med. 2015;12:e1001789.
- 583 25. Choi YJ, Rhee JK, Hur SY, Kim MS, Lee SH, Chung YJ, et al. Intraindividual  
584 genomic heterogeneity of high-grade serous carcinoma of the ovary and clinical  
585 utility of ascitic cancer cells for mutation profiling. J Pathol. 2017;241:57-66.

- 586 26. Marusyk A, Polyak K. Tumor heterogeneity: causes and consequences. *Biochim*  
587 *Biophys Acta.* 2010;1805:105-17.
- 588 27. Polyak K, Haviv I, Campbell IG. Co-evolution of tumor cells and their  
589 microenvironment. *Trends Genet.* 2009;25:30-8.
- 590 28. Gao R, Davis A, McDonald TO, Sei E, Shi X, Wang Y, et al. Punctuated copy number  
591 evolution and clonal stasis in triple-negative breast cancer. *Nat Genet.* 2016;48:1119-  
592 30.
- 593 29. Baslan, T. *et al.* Genome-wide copy number analysis of single cells. *Nat. Protoc.* **7**,  
594 1024–1041 (2012).
- 595 30. McKenna, A. *et al.* The Genome Analysis Toolkit: A MapReduce framework for  
596 analyzing next-generation DNA sequencing data. *Genome Res.* **20**, 1297–1303 (2010).
- 597 31. Lodato, M. A. *et al.* Somatic mutation in single human neurons tracks developmental  
598 and transcriptional history. *Science (80-. ).* **350**, 94–98 (2015).
- 599 32. Koboldt, D. C. *et al.* VarScan 2: Somatic mutation and copy number alteration  
600 discovery in cancer by exome sequencing VarScan 2: Somatic mutation and copy  
601 number alteration discovery in cancer by exome sequencing. *Genome Res.* **22**, 568–  
602 576 (2012).
- 603 33. Cibulskis, K. *et al.* Sensitive detection of somatic point mutations in impure and  
604 heterogeneous cancer samples. *Nat. Biotechnol.* **31**, 213–219 (2013).
- 605
- 606
- 607
- 608

609

610

611

612

613

614 **Figure 1: An overview of individual tumor spheroid isolation from malignant ascites.** (A)

615 A malignant ascites was collected during a primary debulking surgery. Tumor spheroids in

616 the malignant ascites were purified, fixed and prepared on a discharging layer (Indium Tin

617 Oxide (ITO), 100 nm in thickness)-coated glass slide. (B) The laser isolation technique was

618 used to isolate individual tumor spheroids. This technique utilizes an IR pulsed laser, which

619 vaporizes the discharging layer on the glass slide. Using this technique, ten individual tumor

620 spheroids were isolated from the slide. The isolated cells underwent WGA and sequencing.

621 (C) The images before and after isolation demonstrate that the targeted tumor spheroids in the

622 malignant ascites were specifically isolated without disturbing the neighboring cells. The

623 scale bars represent 100  $\mu\text{m}$ .

624

625 **Figure 2: WGA of the isolated tumor spheroids and several quality metrics of the**

626 **amplified products.** (A) MDA was performed to amplify the DNA in each tumor spheroid.

627 MDA amplified tumor spheroid DNA  $10^3$ - to  $10^4$ -fold. (B) The amplification process was

628 monitored by observing the fluorescence signal in each reaction. A non-template control was

629 included in the reaction to testify carry-over contamination. The results showed that there was

630 no or a negligible amount of carry-over contamination. (C, D) The distributions of the

631 normalized read depth and VAF reflect the quality of the WGA products. Compared with the

632 distributions of the amplified products from single cells, the distributions of the tumor

633 spheroids were similar to those of the primary tissues. This indicated that the amplified

634 products from the tumor spheroids had a negligible amount of WGA artifacts.

635

636 **Figure 3: CNA analysis based on the genetic subclones of the tumor cells identified via**

637 **low-depth WGS.** (A) A genome-wide CNA analysis was performed using the low-depth  
638 WGS data. Each row represents each sample, and the samples were reordered by the  
639 hierarchical clustering method. The clustering analysis generated three major clusters, which  
640 were named Primary clone (red), Ascites clone 1 (yellow), and Ascites clone 2 (green). The  
641 clear differentiation of the CNA profiles between the Primary clone and Ascites clones  
642 implied that the tumor spheroids in the Ascites clones were not derived from the tumor cells  
643 in the Primary clone but from another independent tumor lineage. (B) Representation of the  
644 CNA profiles in detail at several regions for RO1, AC1, and AC4. The three samples  
645 exhibited both shared and exclusive CNAs. For example, deletion of FAT1 (1<sup>st</sup> column) and  
646 amplification of MYC, CYC1, and PARP10 (2<sup>nd</sup> column) were shared in every sample.  
647 However, the amplification of KDM5A (3<sup>rd</sup> column) and NOTCH3 (4<sup>th</sup> column) was  
648 exclusive to the Primary clone. This might indicate that the FAT1, MYC, CYC1, or PARP10  
649 alterations conferred a growth advantage to the common ancestor of the Primary clone and  
650 Ascites clones. In contrast, the KDM5A or NOTCH3 amplifications might cause branching  
651 from the common ancestor and proliferation of the Primary clone

652

653 **Figure 4: SNV analysis based on the WES data.** The WES data from the primary tissue  
654 samples and tumor spheroids were used to analyze the SNVs. The results showed that a  
655 significant portion of the SNVs was shared in the Primary clone and Ascites clone 1. At the  
656 same time, the Primary clone and Ascites clone 1 had unique mutations. This result suggests  
657 that the two clones might have branched from a common ancestor. Ascites clone 2 was  
658 excluded from the analysis because the tumor spheroids in Ascites clone 2 were presumed to  
659 contain a large number of normal cells in each tumor spheroid.

660

661 **Figure 5: Analysis of the allele frequency to infer the cellular composition of each**

662 **sample.** The VAF distribution was plotted for each sample from the (A) Primary site and (B,  
663 C) Ascites. The mutations were categorized into common, primary-only or ascites-only  
664 mutations. Common mutations were somatic SNVs, which were detected in both the Primary  
665 clone and Ascites clones, and primary-only and ascites-only mutations, which were shared  
666 somatic SNVs detected only in the Primary clone and Ascites clones, respectively. The results  
667 showed that most of the VAF distributions from Ascites clone 2 were located at a much lower  
668 range than those from the Primary clone and Ascites clone 1. This suggests that the tumor  
669 spheroids in Ascites clone 2 had a large proportion of normal cells in each tumor spheroid.

670

671 **Figure 6: Constructing phylogenetic trees.** Phylogenetic trees were constructed using both  
672 the (A) CNA profiles and (B) SNV profiles. The two trees presented similar topologies and  
673 indicated that the Primary clone and Ascites clone 1 were derived from one ancestral clone at  
674 the early stage of cancer development. In addition, the phylogenetic trees indicated that the  
675 analyzed tumor spheroids were not derived from the primary tumor cells that were present at  
676 the time of sampling.

677

678 **Figure 7: The inferred evolutionary history of the tumor and the Circos plot of the**

679 **major subclones.** (A) Based on the sequencing data from the primary tissue samples and the  
680 tumor spheroids from the ascites, the evolutionary trajectory was inferred. The tumor was  
681 initiated at the right ovary to generate the ancestral clone. With the further accumulation of  
682 mutations, the ancestral clone evolved into two subclones, the first of which was found in the  
683 right ovary and metastasized to the left ovary. The second subclone shed into the ascites TME  
684 and became extinct or dominated by the first subclone in the right ovary. Eventually, the



685 Ascites subclone moved to the peritoneal cavity. (B) The Circos plot presents the genome-  
686 wide alterations in the ancestral, Primary, and Ascites subclones. For the SNVs, the black, red,  
687 and yellow bars represent the ancestral, primary-only, and ascites-only mutations,  
688 respectively. The tumor cells acquired the ancestral mutations before dividing into the  
689 Primary and Ascites clones. After division, the Primary and Ascites clones acquired lineage-  
690 specific SNVs. For the CNAs, the red and blue bars represent amplification and deletion,  
691 respectively.

Figure 1

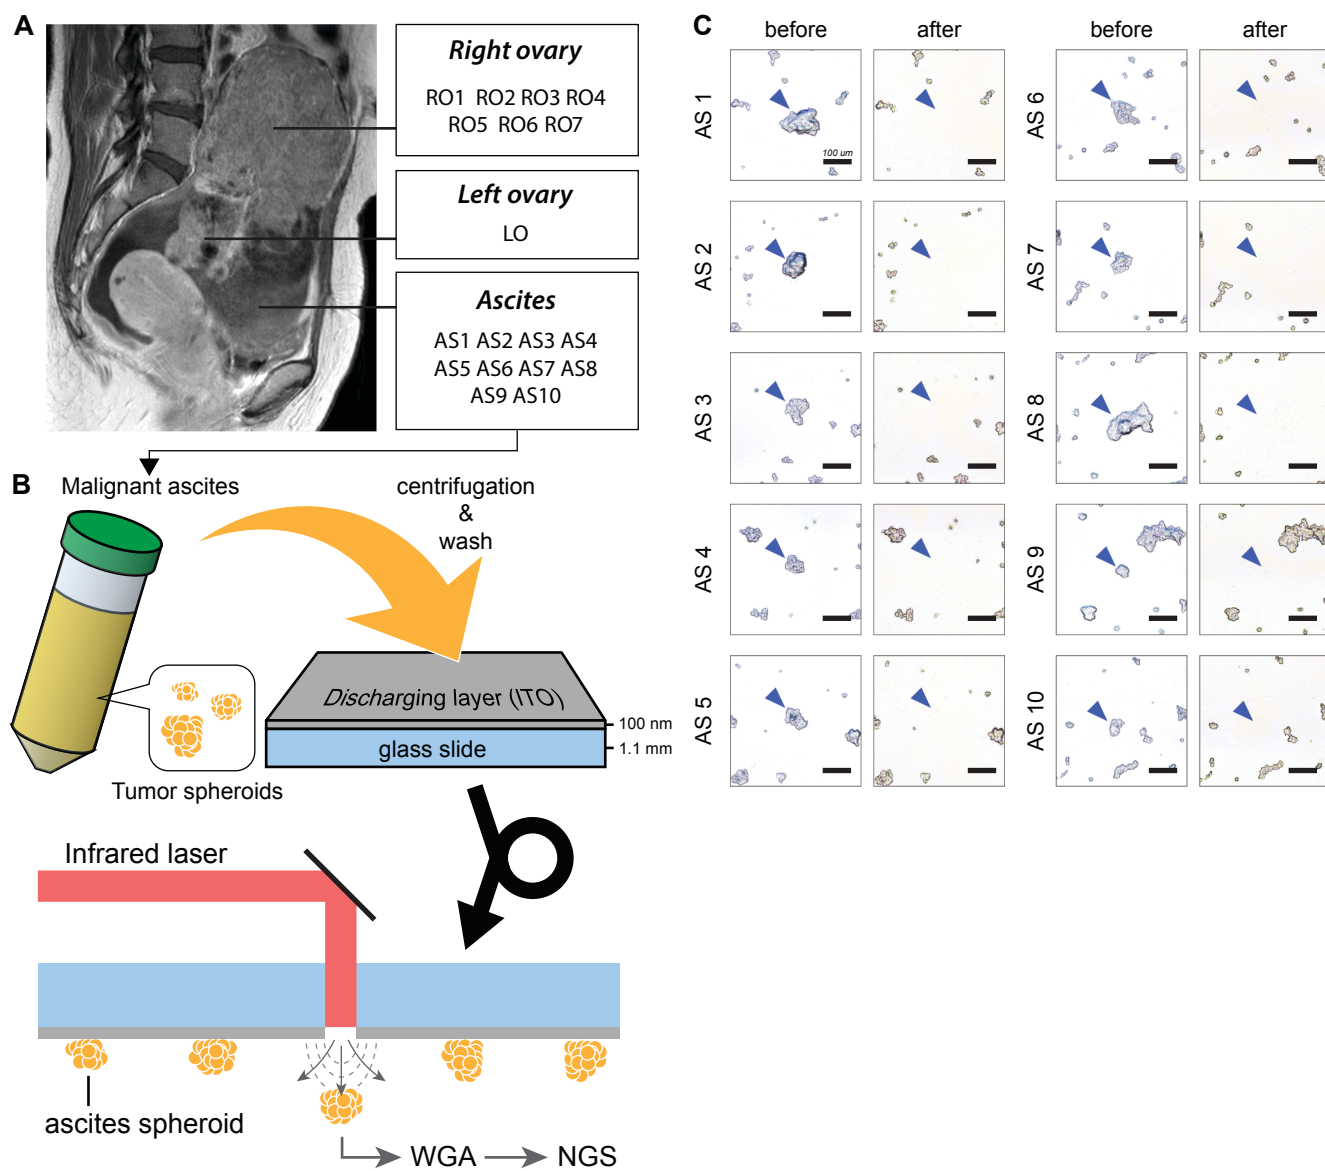

Figure 2

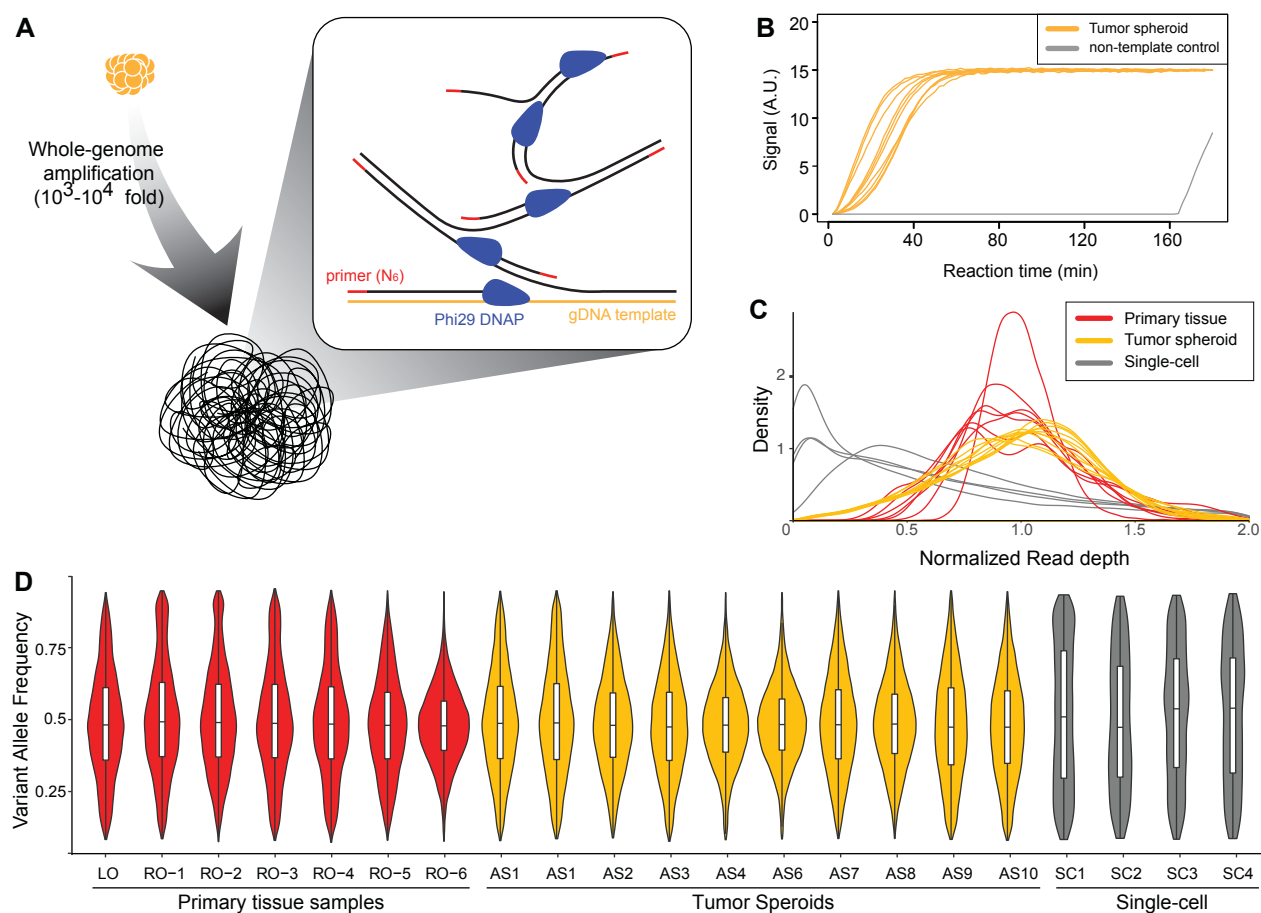

Figure 3

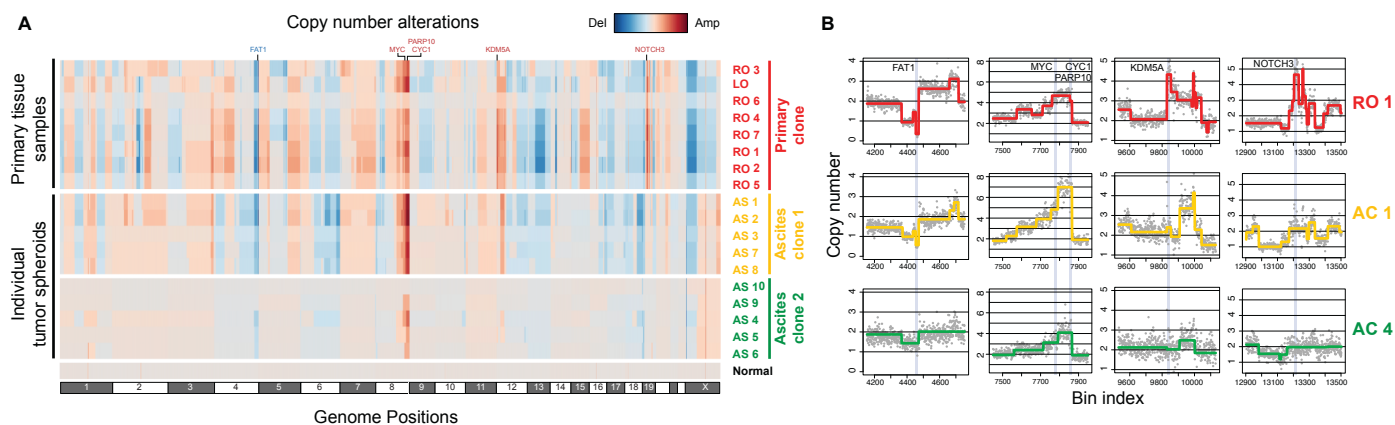

Figure 4

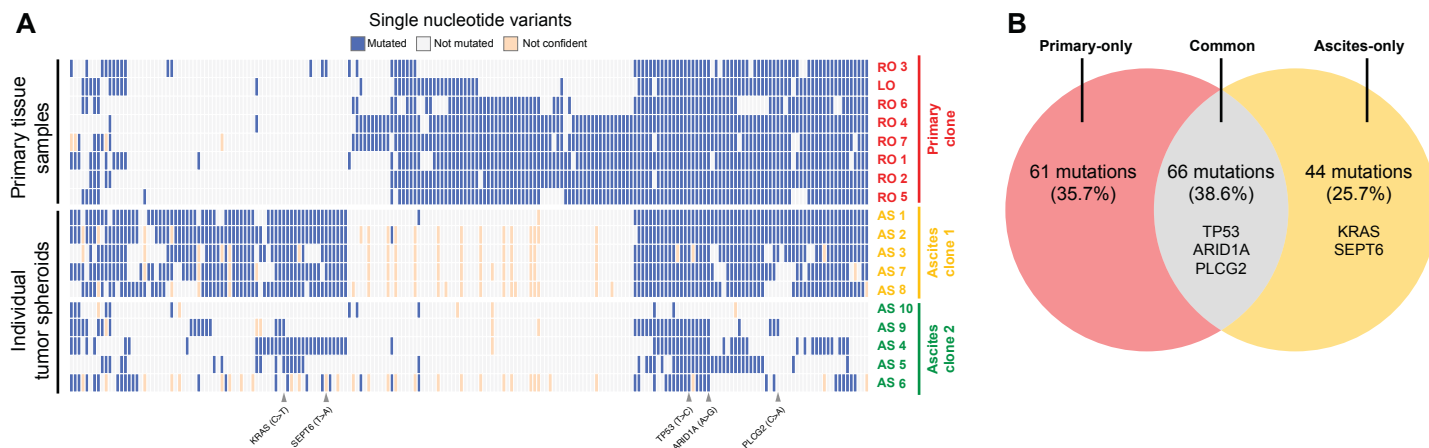

Figure 5

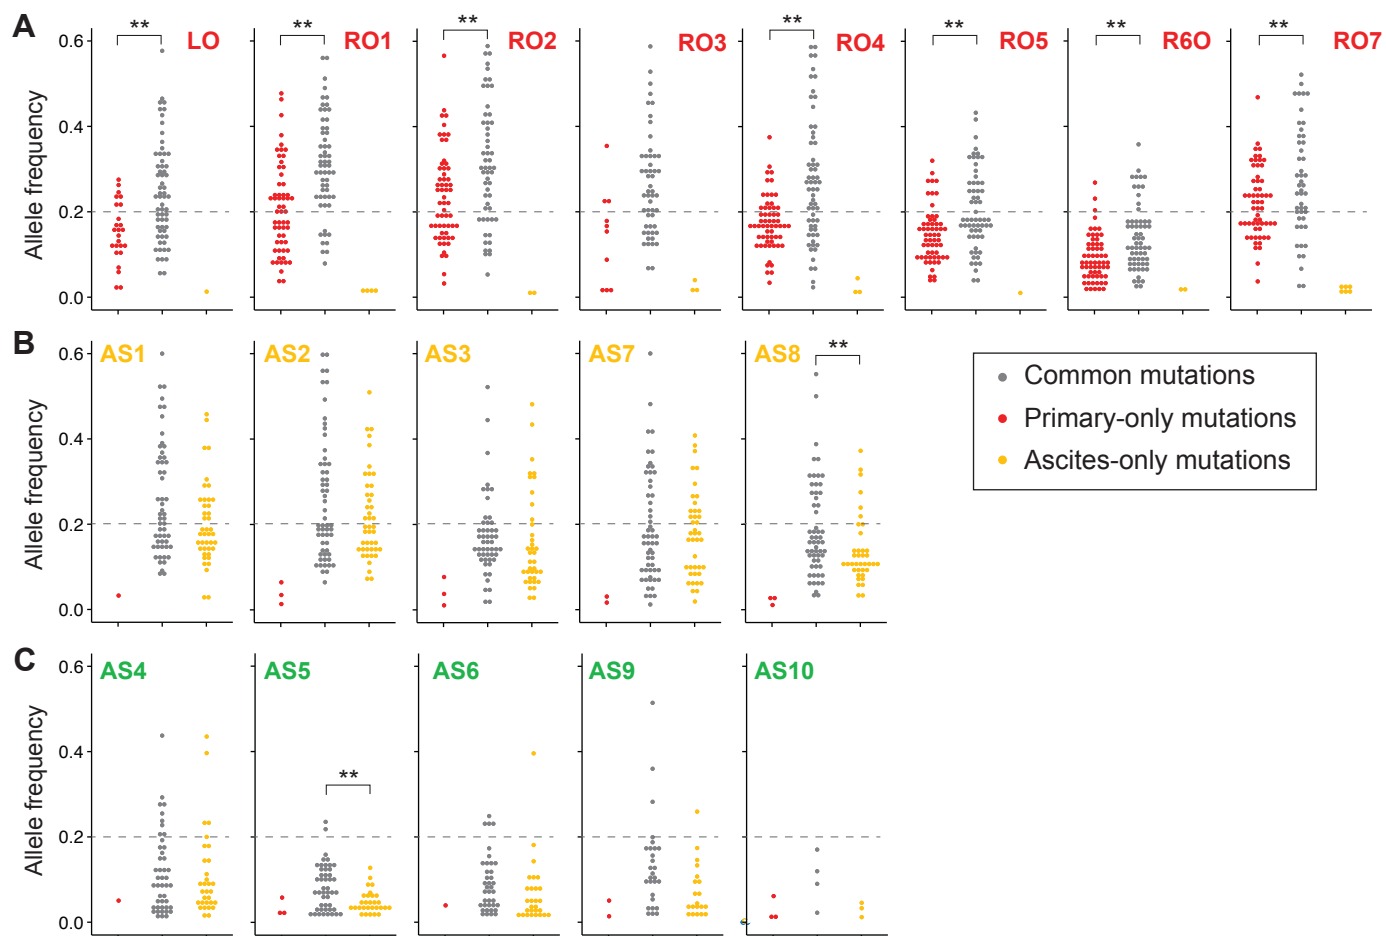

Figure 6

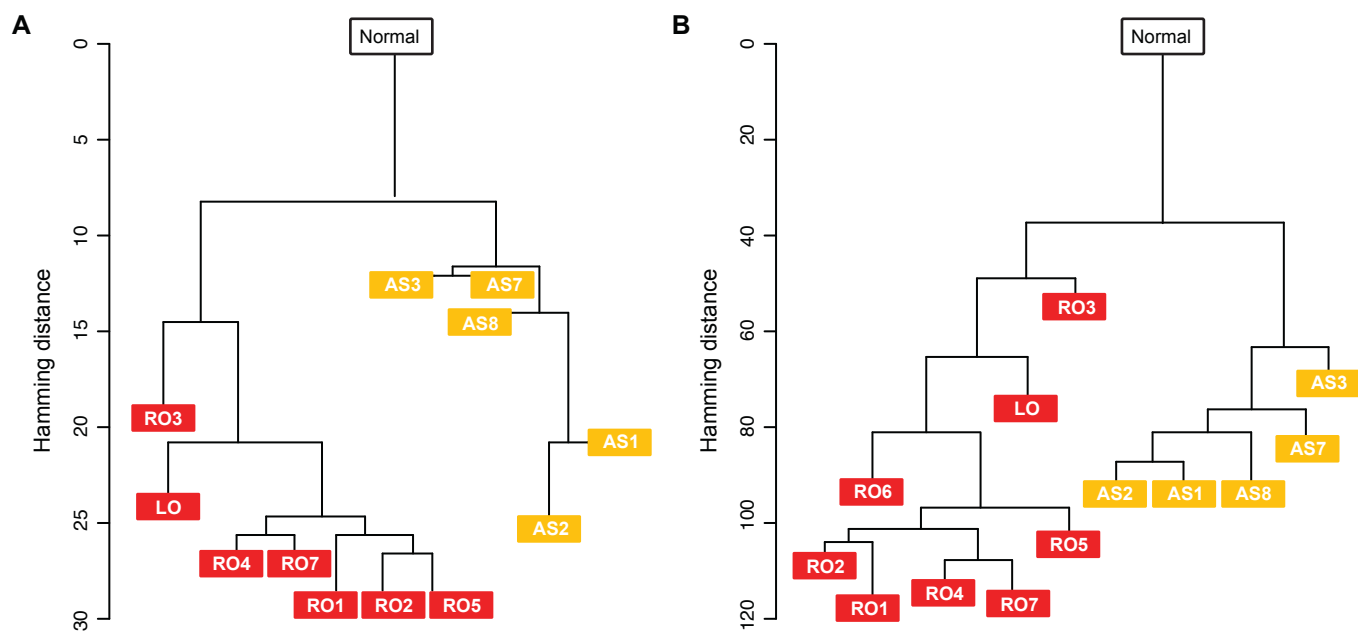

Source: https://www.biorxiv.org/content/10.1101/282277v2.full.pdf
